# Supplementary material for: In Vitro Replication Inhibitory Activity of Xanthorrhizol against Severe Acute Respiratory Syndrome Coronavirus 2
Source: Biomedicines. 2021 Nov 19;9(11):1725. doi: 10.3390/biomedicines9111725 (PMC8615586; doi:10.3390/biomedicines9111725)
Supplement: Supplementary file 1 [file biomedicines-09-01725-s001.zip › biomedicines-1457279-supplementary.pdf]

## Supplementary Materials

### In Vitro Replication Inhibitory Activity of Xanthorrhizol against Severe Acute Respiratory Syndrome Coronavirus 2

Minwoo Kim <sup>1,†</sup>, Hee Cho <sup>1,†</sup>, Dae-Gyun Ahn <sup>1,‡</sup>, Hae-Gwang Jung <sup>1</sup>, Han Young Seo <sup>1</sup>, Ji-Su Kim <sup>1</sup>, Youn-Jung Lee <sup>2</sup>, Jun Yong Choi <sup>2</sup>, In Ho Park <sup>3</sup>, Jeon-Soo Shin <sup>3,4</sup>, Seong-Jun Kim <sup>5</sup> and Jong-Won Oh <sup>1,\*</sup>

<sup>1</sup>*Department of Biotechnology, Yonsei University, 50 Yonsei-ro, Seodaemun-gu, Seoul 03722, Korea*

<sup>2</sup>*Division of Infectious Diseases, Department of Internal Medicine, Yonsei University College of Medicine, Seoul 03722, Korea*

<sup>3</sup>*Severance Biomedical Science Institute, Yonsei University College of Medicine, Seoul 03722, Korea*

<sup>4</sup>*Department of Microbiology, Yonsei University College of Medicine, Seoul 03722, Korea*

<sup>5</sup>*Center for Convergent Research of Emerging Virus Infection, Korea Research Institute of Chemical Technology, Daejeon 34114, Korea*

<sup>†</sup>These authors contributed equally to this work.

<sup>‡</sup>Current address: Center for Convergent Research of Emerging Virus Infection, Korea Research Institute of Chemical Technology, Daejeon 34114, Korea.

#### Contents:

Supplementary Tables 1 and 2

Supplementary Figures 1–7

Supplementary References

\*Correspondence should be addressed to J.-W.O. (jwoh@yonsei.ac.kr).

## Supplementary Tables

Supplementary Table S1. Primer sets used for quantification of viral RNA levels by RT-qPCR

| Gene         | Primer set | Sequence (5'-3') <sup>a</sup>         | Ref. |
|--------------|------------|---------------------------------------|------|
| SARS-CoV-2   | Forward    | CCCTGTGGGTTTTACACTTAA                 | [1]  |
|              | Reverse    | ACGATTGTGCATCAGCTGA                   |      |
|              | Probe      | FAM-CCGTCTGCGGTATGTGGAAAGGTTATGG-BHQ1 |      |
| SARS-CoV N   | Forward    | ATATTAGGTTTTTACCTACCCAGG              | [2]  |
|              | Reverse    | CGTCGGGTAGCTCTTCGGTAG                 |      |
|              | Probe      | FAM-TCCTCCTTGCCATGCTGAGTGAGA-BHQ1     |      |
| HCV replicon | Forward    | GCGTCTAGCCATGGCCTTAGTATGAGTGTC        | [3]  |
|              | Reverse    | ACCACAAGGCCTTTCGCGACCCAACACTAC        |      |
|              | Probe      | FAM-CTGCGGAACCGGTGAGTACAC-TAMRA       |      |
| MNV-1        | Forward    | CACGCCACCGATCTGTTCTG                  | [4]  |
|              | Reverse    | GCGCTGCGCCATCACTC                     |      |
| NoV-GI       | Forward    | CGYTGGATGCGNTTYCATGA <sup>a</sup>     | [5]  |
|              | Reverse    | CTTAGACGCCATCATCATTYAC <sup>a</sup>   |      |
| hGAPDH       | Forward    | GAAGGTGAAGGTCGGAGTC                   | [6]  |
|              | Reverse    | GAAGATGGTGATGGGATTTC                  |      |

<sup>a</sup> Mixed bases are as follows: Y, C or T; N, any. NoV-GI, human norovirus genotype I.

Supplementary Table S2. Differences in ORF1ab amino acids between three SCoV2 strains used in this study

| Gene name | a.a. position | Wuhan/Hu-1 <sup>a</sup> | KCDC03 (S) | YS006 (GH)              | YS117 (Delta) |
|-----------|---------------|-------------------------|------------|-------------------------|---------------|
| nsp2      | 85            | Thr                     | Thr        | <b>Ile</b> <sup>b</sup> | Thr           |
| nsp3      | 77            | Leu                     | Phe        | <b>Leu</b>              | <b>Leu</b>    |
|           | 707           | Ile                     | Ile        | Ile                     | <b>Leu</b>    |
|           | 792           | His                     | His        | His                     | <b>Leu</b>    |
|           | 822           | Pro                     | Pro        | Pro                     | <b>Leu</b>    |
| nsp4      | 293           | Val                     | Val        | Val                     | <b>Ile</b>    |
|           | 446           | Ala                     | Ala        | Ala                     | <b>Val</b>    |
| nsp6      | 149           | Val                     | Val        | Val                     | <b>Ala</b>    |
|           | 181           | Thr                     | Thr        | Thr                     | <b>Ile</b>    |
| nsp7      | 25            | Ser                     | Ser        | <b>Leu</b>              | Ser           |
| nsp12     | 323           | Pro                     | Pro        | <b>Leu</b>              | <b>Leu</b>    |
|           | 671           | Gly                     | Gly        | Gly                     | <b>Ser</b>    |
| nsp13     | 77            | Pro                     | Pro        | Pro                     | <b>Leu</b>    |
|           | 210           | Val                     | Val        | Val                     | <b>Ile</b>    |
| nsp14     | 394           | Ala                     | Ala        | Ala                     | <b>Val</b>    |
| nsp16     | 6             | Gln                     | Gln        | <b>Leu</b>              | Gln           |

<sup>a</sup> Wuhan/Hu-1, MN988668; KCDC03, MT020782; YS006, MW345824; YS117, MZ798798

<sup>b</sup> Amino acid changes in the YS006 and YS117, in comparison to the reference strain KCDC003, are in bold-type.

## Supplementary Figures

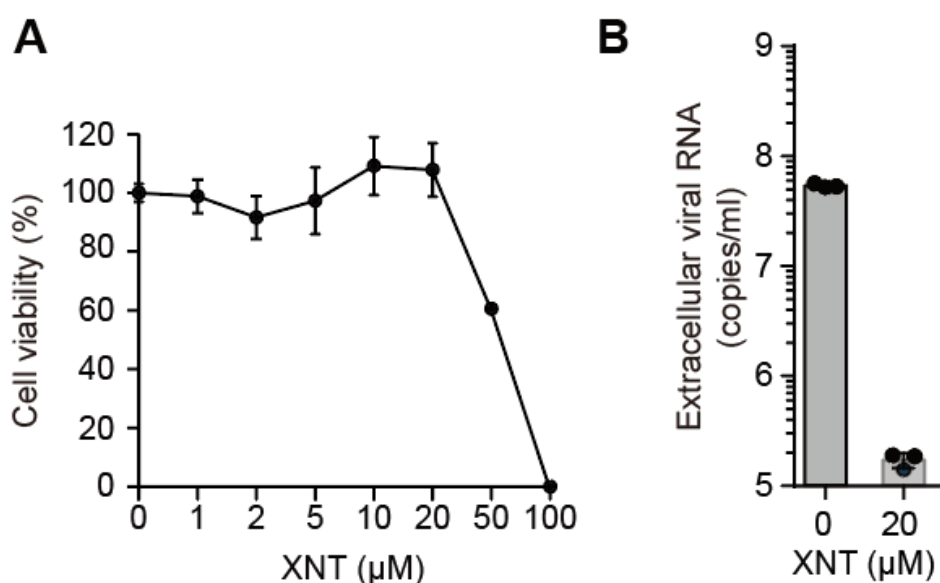

**Supplementary Figure S1.** SCoV2 inhibitory activity of XNT in Calu-3 cells. **(A)** Cytotoxicity of XNT, assessed by MTS assay 24 h after treatment of Calu-3 cells with increasing concentrations of XNT. The experiments were performed in biological triplicates. **(B)** Extracellular viral RNA titers, determined 48 h after treatment of SCoV2-infected Calu-3 cells (MOI = 0.01) with 20  $\mu\text{M}$  XNT. Bars represent mean values  $\pm$  SD, and dots represent three biological replicates.

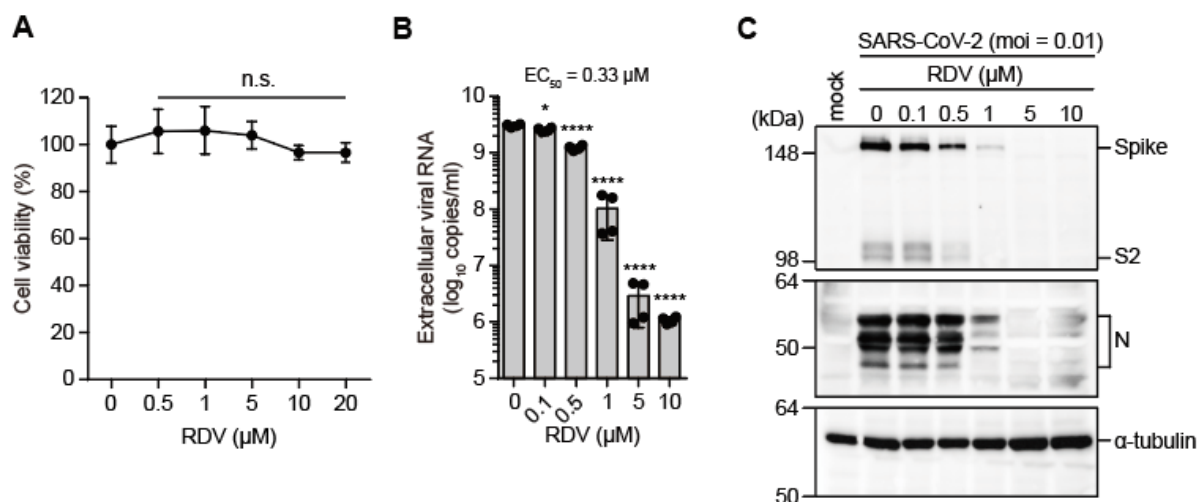

**Supplementary Figure S2.** Antiviral activity of remdesivir (RDV) against SCoV2. **(A)** Cytotoxicity of RDV, assessed by MTS assay 48 h after treatment of Vero E6 cells with increasing concentrations of RDV. Data are mean  $\pm$  SD from biological triplicates. **(B and C)** Extracellular viral RNA titers, determined 48 h after treatment of SARS-CoV-2-infected Vero E6 cells (MOI = 0.01) with increasing concentrations of RDV **(B)**. Immunoblots for the indicated viral proteins are shown below bar graph **(C)**. In **(B)**, bars represent mean values, and dots represent two biological replicates conducted with technical duplicates. \* $p < 0.05$ ; \*\*\*\* $P < 0.0001$ ; n.s., not significant; by unpaired two-tailed Student's  $t$ -test

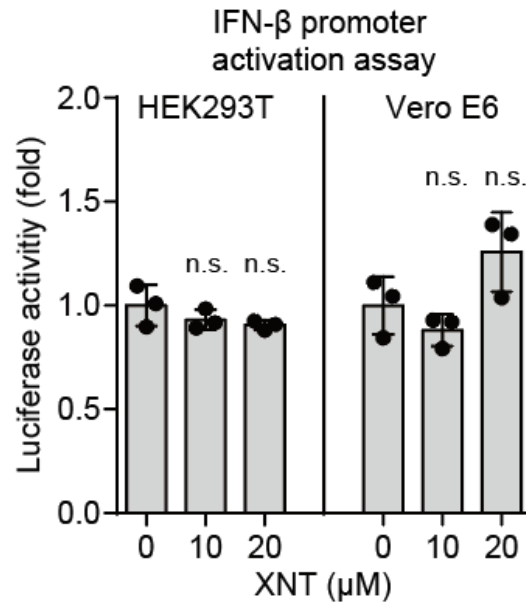

**Supplementary Figure S3.** XNT treatment does not induce interferon  $\beta$  production. Firefly luciferase (Fluc) expression under the control of *IFN- $\beta$*  promoter was determined 24 h after treatment with XNT following transfection of HEK293T or Vero E6 cells with the assay reporter. Shown are the fold-changes of normalized Fluc activity relative to DMSO (0.1%) vehicle-treated control. Bars represent mean values from biological triplicates, and each dot represent the average of two technical replicates (each from biological triplicates). n.s., not significant; by unpaired two-tailed Student's *t*-test.

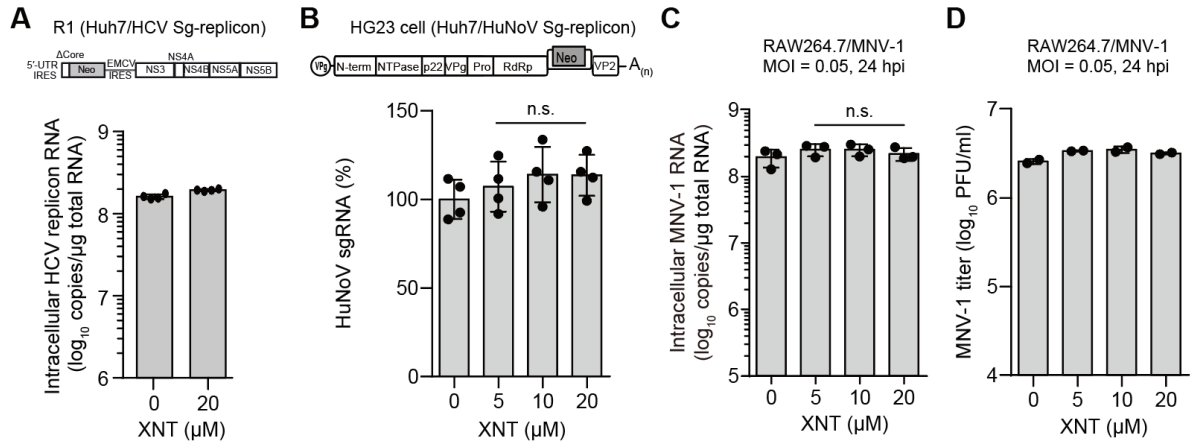

**Supplementary Figure S4.** Selective inhibition of SCoV replication by XNT. (**A** and **B**) Antiviral activity of XNT in R-1 and HG23 cell lines, which harbor a self-replicating HCV (**A**) and human norovirus (**B**) subgenomic replicon, respectively, assessed by RT-qPCR quantification of intracellular replicon RNA titer 2 days after XNT treatment. Data in (**A**) are shown as mean  $\pm$  SD from biological quadruplicates, each with two technical replicates. Each dot represents the average of two technical replicates. In (**B**), dots represent data points from two biological replicates, each with two technical replicates. (**C** and **D**) Intracellular MNV-1 genome copy number (**C**) and virus loads (**D**), determined 24 h after infection of RAW264.7 cells with MNV-1 (MOI = 0.05). In (**C**), bars represent mean values, and dots represent the averages of two technical replicates, each from biological triplicates. In (**D**), bars represent averages values, and dots represent two technical replicates for a representative experiment. n.s., not significant; by unpaired two-tailed Student's *t*-test.

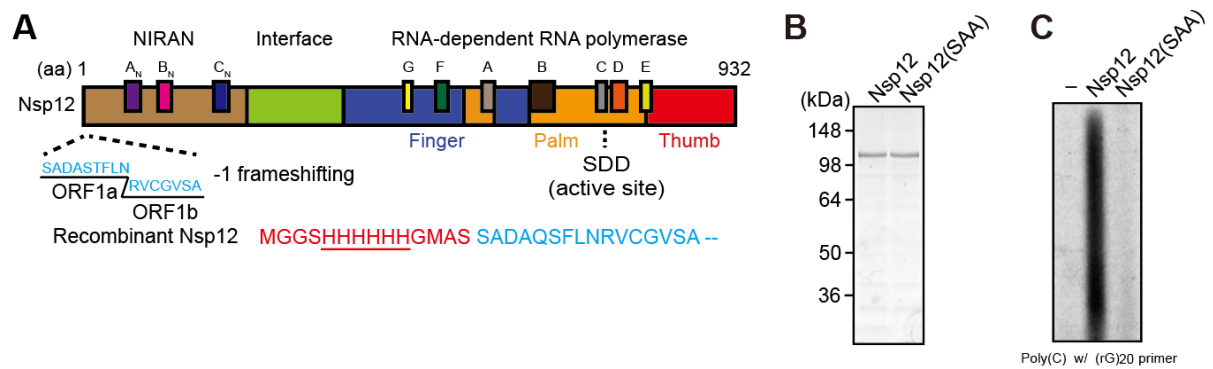

**Supplementary Figure S5.** Expression and purification of a full-length, functionally active SCoV2 Nsp12 protein. **(A)** Schematic of the recombinant N-terminal (His)<sub>6</sub>-tagged Nsp12 protein. The authentic Nsp12 amino acids sequence and extra-amino acids added during cloning procedure are shown in blue and red, respectively. **(B)** Purified wild-type Nsp12 and its inactive mutant Nsp12(SAA) resolved by SDS-PAGE and stained with Coomassie blue. **(C)** Autoradiography of radioisotope-labeled RNA products produced from a poly(C) RNA template in the presence of the (rG)<sub>20</sub> primer. Quantification data are means  $\pm$  SD from three independent experiments.

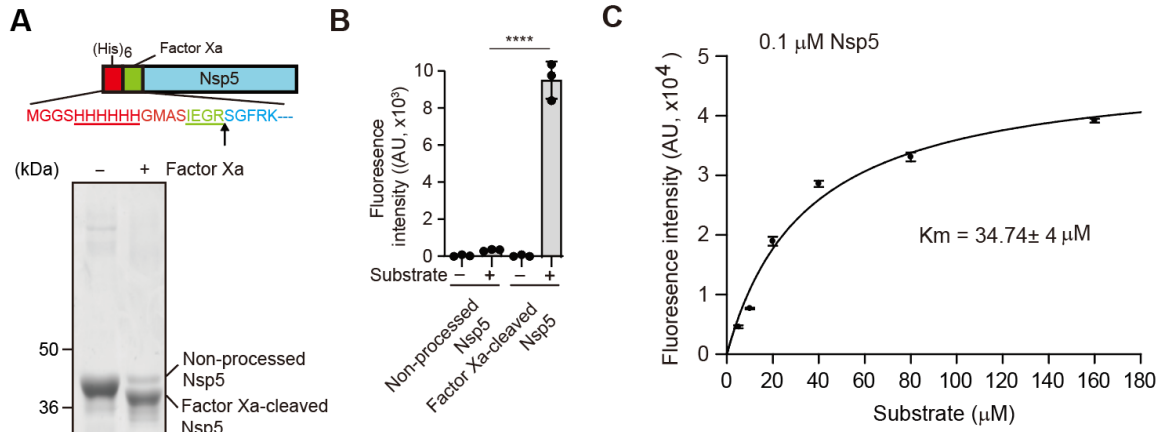

**Supplementary Figure S6.** An *in vitro* SCoV2 Nsp5 protease assay using a purified Nsp5 protein. **(A)** Schematic of the N-terminal (His)<sub>6</sub>-tagged recombinant Nsp5 protein. The authentic Nsp5 amino acids sequence and extra-amino acids added during cloning procedure are shown in blue and red, respectively, with the factor Xa-cleavage site indicated by an arrow. Shown below is the factor Xa-processed recombinant protein, visualized by staining with Coomassie blue following SDS-PAGE. **(B)** A FRET-based Nsp5 protease assay demonstrating that removal of the N-terminal fusion part by factor-Xa treatment is critical to confer enzyme activity to the processed form. Data are means  $\pm$  SD from three independent experiments. \*\*\*\* $P < 0.0001$ ; by unpaired two-tailed Student's *t*-test. **(C)** Determination of K<sub>m</sub> of the purified Nsp5 protein.

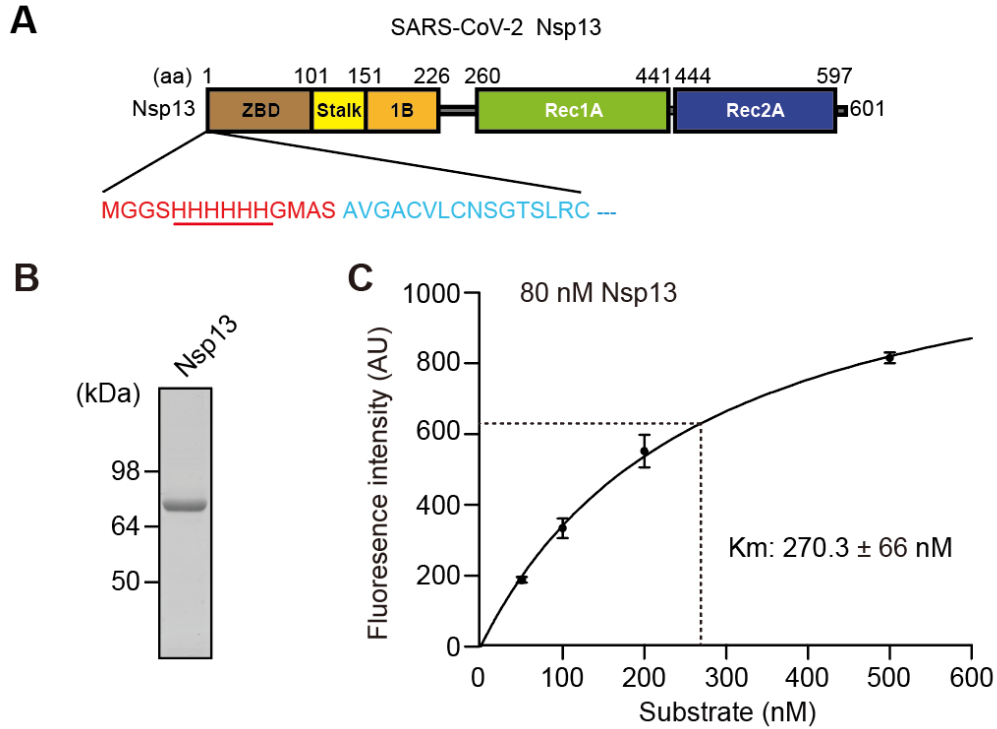

**Supplementary Figure S7.** An *in vitro* SCoV2 Nsp13 helicase assay using a purified Nsp13 protein. **(A)** Schematic of the recombinant N-terminal (His)<sub>6</sub>-tagged Nsp13 protein. The authentic Nsp13 amino acids sequence and extra-amino acids added during cloning procedure are shown in blue and red, respectively. Shown below is the purified Nsp13 recombinant protein used in the assay. **(B)** Determination of  $K_m$  of SCoV2 Nsp13 protein. Data are means  $\pm$  SD from three independent experiments.

## Supplementary References

1. National Institute for Viral Disease Control and Prevention (2020) Specific primers and probes for detection 2019 novel coronavirus, [http://ivdc.chinacdc.cn/kyjz/202001/t20200121\\_211337.html](http://ivdc.chinacdc.cn/kyjz/202001/t20200121_211337.html) (accessed on 10 October 2021).
2. Ahn, D.G.; Lee, W.; Choi, J.K.; Kim, S.J.; Plant, E.P.; Almazan, F.; Taylor, D.R.; Enjuanes, L.; Oh, J.W. Interference of ribosomal frameshifting by antisense peptide nucleic acids suppresses SARS coronavirus replication. *Antiviral Res.* **2011**, *91*, 1-10.
3. Kim, S.J.; Kim, J.H.; Kim, Y.G.; Lim, H.S.; Oh, J.W. Protein kinase C-related kinase 2 regulates hepatitis C virus RNA polymerase function by phosphorylation. *J. Biol. Chem.* **2004**, *279*, 50031-50041.
4. Baert, L.; Wobus Christiane, E.; Van Coillie, E.; Thackray Larissa, B.; Debevere, J.; Uyttendaele, M. Detection of murine norovirus 1 by using plaque assay, transfection assay, and real-time reverse transcription-PCR before and after heat exposure. *Appl. Environ. Microbiol.* **2008**, *74*, 543-546.
5. Kageyama, T.; Kojima, S.; Shinohara, M.; Uchida, K.; Fukushi, S.; Hoshino, F.B.; Takeda, N.; Katayama, K. Broadly reactive and highly sensitive assay for Norwalk-like viruses based on real-time quantitative reverse transcription-PCR. *J. Clin. Microbiol.* **2003**, *41*, 1548-1557.
6. Lee, W.; Kim, M.; Lee, S.H.; Jung, H.G.; Oh, J.W. Prophylactic efficacy of orally administered *Bacillus* poly- $\gamma$ -glutamic acid, a non-LPS TLR4 ligand, against norovirus infection in mice. *Sci. Rep.* **2018**, *8*, 8667.
